# Supplementary material for: Base-Catalyzed Polymerization of a Substituted Methylenebicyclo[3.3.1]nonane
Source: Hindawi journal article supplement (doi:10.1155/2023/5580382), 2023-10-12
Supplement: f1 [file 5580382.f1.zip]

Archive with 2 entries (2 files):
- 5580382.f1/Scheme 1.pdf
- 5580382.f1/Supplementary Information BCN-Polymer IJPS 23092023 350 PM.docx
