# Supplementary material for: Base-Catalyzed Polymerization of a Substituted Methylenebicyclo[3.3.1]nonane
Source: Hindawi journal article supplement (doi:10.1155/2023/5580382), 2023-10-12
Supplement: f1 [file 5580382.f1.zip › 5580382.f1/Supplementary Information BCN-Polymer IJPS 23092023 350 PM.docx]

**Supplementary Information**


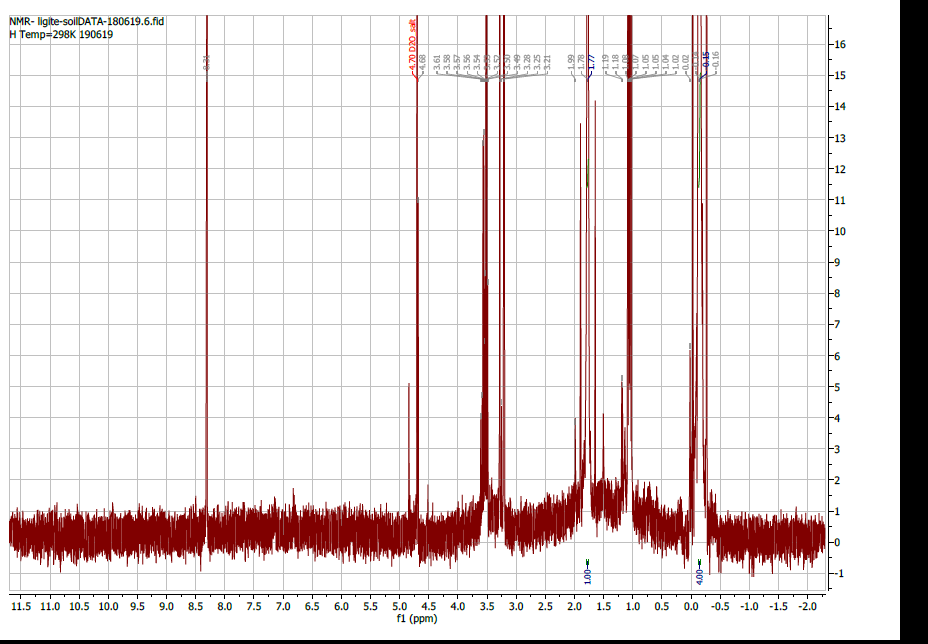


**SI-1:** 1H-NMR spectrum in the region δ 2.0 - 11.5 ppm, which provides concrete evidence for the aliphatic/ alicyclic nature of the compound. Since this 1H-NMR spectrum was recorded in D2O, the protons of NH2 and COOH get exchanged by Deuterium and hence not observed in this spectrum.


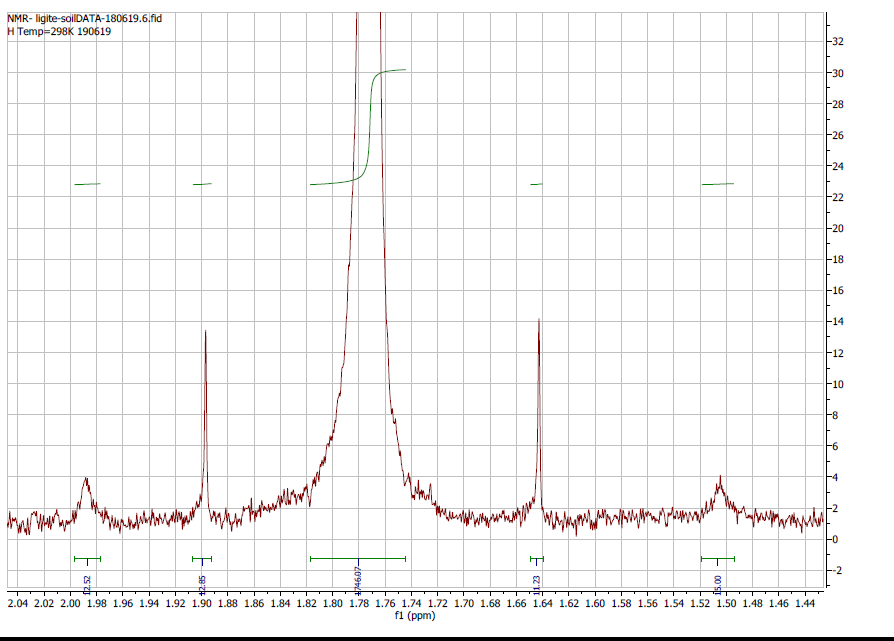


**SI-2 :** Expanded 1H-NMR spectrum in the region δ 1.44 – 2.04 ppm where signals for different -CH2- and -CH3 groups are observed. Detailed 1H-NMR assignments are included in the text of the manuscript
