# Supplementary figures and images for: Base-Catalyzed Polymerization of a Substituted Methylenebicyclo[3.3.1]nonane
Source: Hindawi journal article supplement (doi:10.1155/2023/5580382), 2023-10-12

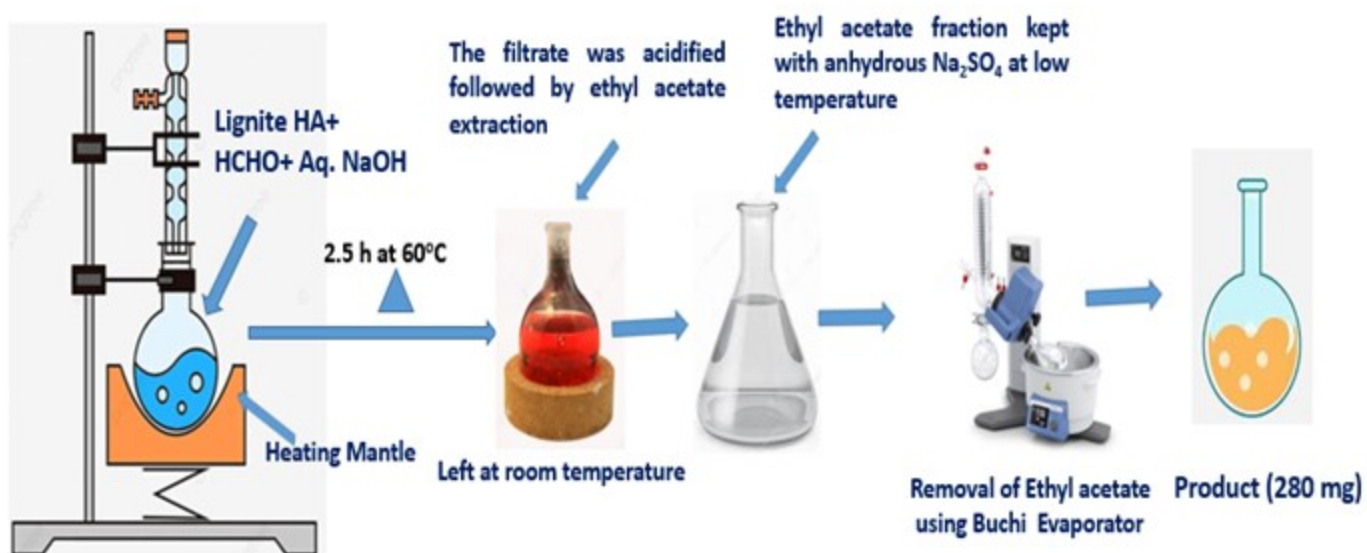

Supplement: f1 [file 5580382.f1.zip]
